# Supplementary material
Source: PubMed Central journal article supplement (PMC9202736)
Supplement: NIHMS1815461-supplement-Hassan_et_al_Supplemental_data_2022.pdf [file NIHMS1815461-supplement-Hassan_et_al_Supplemental_data_2022.pdf]

Table S1. Control mouse diet (Ca:ratio = 1.5)

**AIN-93M Maintenance Purified Diet (also known as #5801-M) 58M1**

**DESCRIPTION**

TestDiet® AIN-93M Maintenance Purified Diet is the maintenance diet for rodents recommended by the American Institute of Nutrition. It is formulated to substitute for the previous version (AIN-76A) to improve animal performance.

Storage conditions are particularly critical to TestDiet® products, due to the absence of antioxidants or preservative agents. To provide maximum protection against possible changes during storage, store in a dry, cool location. Storage under refrigeration (2° C) is recommended. If long term studies are involved, store the diet at -20° C or colder. Be certain to keep in air tight containers.

| Product Forms Available* | Catalog # |
|--------------------------|-----------|
| 1/2" Pellet              | 7603      |
| 1/2" Pellet, Irradiated  | 1810541   |
| 3/16" Pellet             | 1812811   |
| Meal                     | 1810540   |
| Meal, Irradiated         | 1810542   |

\*Other Forms Available By Request

**TYPICAL ANALYSIS**

|                           |        |
|---------------------------|--------|
| Protein.....              | 13.06% |
| Fat.....                  | 4.0%   |
| Fiber.....                | 5.0%   |
| Carbohydrate.....         | 73.8%  |
| Metabolizable Energy..... | 3.83   |

**INGREDIENTS (%)**

|                       |         |
|-----------------------|---------|
| Corn Starch           | 46.5692 |
| Dextrin               | 15.5000 |
| Casein - Vitamin Free | 14.0000 |
| Sucrose               | 10.0000 |
| Powdered Cellulose    | 5.0000  |
| Soybean Oil           | 4.0000  |
| AIN 93M Mineral Mix   | 3.5000  |
| AIN 93 Vitamin Mix    | 1.0000  |
| Choline Bitartrate    | 0.2500  |
| L-Cystine             | 0.1800  |
| t-Butylhydroquinone   | 0.0008  |

**FEEDING DIRECTIONS**

Feed ad libitum to mice and rats. Plenty of fresh, clean water should be available at all times.

**CAUTION:**

Perishable, upon receipt store in a cool dry place, refrigeration recommended.

For laboratory animal experimental use only, NOT for human consumption.

2/15/2011

**NUTRITIONAL PROFILE <sup>1</sup>**

| Protein, %       | 13.0 | Minerals                      |       |
|------------------|------|-------------------------------|-------|
| Arginine, %      | 0.49 | Calcium, %                    | 0.50  |
| Histidine, %     | 0.36 | Phosphorus, %                 | 0.31  |
| Isoleucine, %    | 0.67 | Potassium, %                  | 0.36  |
| Leucine, %       | 1.21 | Magnesium, %                  | 0.05  |
| Lysine, %        | 1.02 | Sodium, %                     | 0.13  |
| Methionine, %    | 0.36 | Chlorine, %                   | 0.20  |
| Cystine, %       | 0.23 | Fluorine, ppm                 | 1.0   |
| Phenylalanine, % | 0.67 | Iron, ppm                     | 39    |
| Tyrosine, %      | 0.71 | Zinc, ppm                     | 35    |
| Threonine, %     | 0.54 | Manganese, ppm                | 11    |
| Tryptophan, %    | 0.15 | Copper, ppm                   | 6.0   |
| Valine, %        | 0.80 | Cobalt, ppm                   | 0.0   |
| Alanine, %       | 0.39 | Iodine, ppm                   | 0.21  |
| Aspartic Acid, % | 0.90 | Chromium, ppm                 | 1.0   |
| Glutamic Acid, % | 2.86 | Molybdenum, ppm               | 0.14  |
| Glycine, %       | 0.27 | Selenium, ppm                 | 0.22  |
| Proline, %       | 1.65 |                               |       |
| Serine, %        | 0.77 | <b>Vitamins</b>               |       |
| Taurine, %       | 0.00 | Vitamin A, IU/g               | 4.0   |
|                  |      | Vitamin D-3 (added), IU/g     | 1.0   |
|                  |      | Vitamin E, IU/kg              | 78.8  |
|                  |      | Vitamin K (as menadione), ppm | 0.75  |
|                  |      | Thiamin Hydrochloride, ppm    | 6.0   |
|                  |      | Riboflavin, ppm               | 6.5   |
|                  |      | Niacin, ppm                   | 30    |
|                  |      | Pantothenic Acid, ppm         | 16    |
|                  |      | Folic Acid, ppm               | 2.1   |
|                  |      | Pyridoxine, ppm               | 5.8   |
|                  |      | Biotin, ppm                   | 0.2   |
|                  |      | Vitamin B-12, mcg/kg          | 28    |
|                  |      | Choline Chloride, ppm         | 1,250 |
|                  |      | Ascorbic Acid, ppm            | 0.0   |

| Fat, %                               | 4.1         |          |  |
|--------------------------------------|-------------|----------|--|
| Cholesterol, ppm                     | 0           |          |  |
| Linoleic Acid, %                     | 2.04        |          |  |
| Linolenic Acid, %                    | 0.31        |          |  |
| Arachidonic Acid, %                  | 0.00        |          |  |
| Omega-3 Fatty Acids, %               | 0.31        |          |  |
| Total Saturated Fatty Acids, %       | 0.60        |          |  |
| Total Monounsaturated Fatty Acids, % | 0.88        |          |  |
| Polyunsaturated Fatty Acids, %       | 2.16        |          |  |
|                                      |             |          |  |
| <b>Fiber (max), %</b>                | <b>5.0</b>  |          |  |
|                                      |             |          |  |
| <b>Carbohydrates, %</b>              | <b>73.0</b> |          |  |
|                                      |             |          |  |
| <b>Energy (kcal/g) <sup>2</sup></b>  | <b>3.77</b> |          |  |
| <b>From:</b>                         | <b>kcal</b> | <b>%</b> |  |
| Protein                              | 0.518       | 13.7     |  |
| Fat (ether extract)                  | 0.368       | 9.8      |  |
| Carbohydrates                        | 2.922       | 77.5     |  |

1. Formulation based on calculated values from the latest ingredient analysis information. Since nutrient composition of natural ingredients varies and some nutrient loss will occur due to manufacturing processes, analysis will differ accordingly. Nutrients expressed as percent of ration on an As Fed basis except where otherwise indicated.  
2. Energy (kcal/gm) - Sum of decimal fractions of protein, fat and carbohydrate x 4,9,4 kcal/gm respectively.

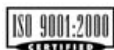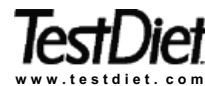

**Table S2. Experimental mouse diet (Ca:P ratio = 10.5)**

**Mod AIN93M w/ 0.11% Phosphorus and 1.5% Calcium**

**5BLX**

**DESCRIPTION**

Modification of TestDiet® AIN-93M Semi-Purified Diet with 0.11% Phosphorus and 1.5% Calcium.

Storage conditions are particularly critical to TestDiet® products, due to the absence of antioxidants or preservative agents. To provide maximum protection against possible changes during storage, store in a dry, cool location. Storage under refrigeration (2° C) is recommended. Maximum shelf life is six months. (If long term studies are involved, storing the diet at -20° C or colder may prolong shelf life.) Be certain to keep in air tight containers.

**Product Forms Available\* Catalog #**  
 3/8" Pellet, Irradiated 1816464-203

*\*Other Forms Available On Request*  
**INGREDIENTS (%)**

|                                  |         |
|----------------------------------|---------|
| Corn Starch                      | 44.0952 |
| Maltodextrin                     | 15.5000 |
| Casein - Vitamin Tested          | 14.0000 |
| Sucrose                          | 10.0000 |
| Powdered Cellulose               | 5.0000  |
| Soybean Oil                      | 4.0000  |
| AIN-93M Min Premix/No phosphorus | 3.5000  |
| Calcium Carbonate                | 2.4740  |
| AIN 93 Vitamin Mix               | 1.0000  |
| Choline Bitartrate               | 0.2500  |
| L-Cystine                        | 0.1800  |
| t-Butylhydroquinone              | 0.0008  |

**FEEDING DIRECTIONS**

Feed ad libitum. Plenty of fresh, clean water should be available at all times.

**CAUTION:**

**Perishable - store properly upon receipt.**  
**For laboratory animal use only; NOT for human consumption.**

4/29/2014

**NUTRITIONAL PROFILE <sup>1</sup>**

|                                     |             |                            |       |
|-------------------------------------|-------------|----------------------------|-------|
| <b>Protein, %</b>                   | <b>12.9</b> | <b>Minerals</b>            |       |
| Arginine, %                         | 0.49        | Calcium, %                 | 1.50  |
| Histidine, %                        | 0.36        | Phosphorus, %              | 0.11  |
| Isoleucine, %                       | 0.67        | Potassium, %               | 0.35  |
| Leucine, %                          | 1.21        | Magnesium, %               | 0.05  |
| Lysine, %                           | 1.02        | Sodium, %                  | 0.14  |
| Methionine, %                       | 0.36        | Chloride, %                | 0.23  |
| Cystine, %                          | 0.23        | Fluorine, ppm              | 1.0   |
| Phenylalanine, %                    | 0.67        | Iron, ppm                  | 39    |
| Tyrosine, %                         | 0.71        | Zinc, ppm                  | 35    |
| Threonine, %                        | 0.54        | Manganese, ppm             | 11    |
| Tryptophan, %                       | 0.15        | Copper, ppm                | 6.0   |
| Valine, %                           | 0.80        | Cobalt, ppm                | 0.0   |
| Alanine, %                          | 0.39        | Iodine, ppm                | 0.21  |
| Aspartic Acid, %                    | 0.90        | Chromium (added), ppm      | 1.0   |
| Glutamic Acid, %                    | 2.86        | Molybdenum, ppm            | 0.15  |
| Glycine, %                          | 0.27        | Selenium, ppm              | 0.19  |
| Proline, %                          | 1.65        |                            |       |
| Serine, %                           | 0.77        | <b>Vitamins</b>            |       |
| Taurine, %                          | 0.00        | Vitamin A, IU/g            | 4.0   |
|                                     |             | Vitamin D-3 (added), IU/g  | 1.0   |
| <b>Fat, %</b>                       | <b>4.1</b>  | Vitamin E, IU/kg           | 78.8  |
| Cholesterol, ppm                    | 0           | Vitamin K, ppm             | 0.75  |
| Linoleic Acid, %                    | 2.04        | Thiamin Hydrochloride, ppm | 6.0   |
| Linolenic Acid, %                   | 0.31        | Riboflavin, ppm            | 6.5   |
| Arachidonic Acid, %                 | 0.00        | Niacin, ppm                | 30    |
| Omega-3 Fatty Acids, %              | 0.31        | Pantothenic Acid, ppm      | 16    |
| Total Saturated Fatty A             | 0.60        | Folic Acid, ppm            | 2.1   |
| Total Monounsaturated               |             | Pyridoxine, ppm            | 5.8   |
| Fatty Acids, %                      | 0.88        | Biotin, ppm                | 0.2   |
| Polyunsaturated Fatty Acids, %      | 2.16        | Vitamin B-12, mcg/kg       | 28    |
|                                     |             | Choline Chloride, ppm      | 1,250 |
| <b>Fiber (max), %</b>               | <b>5.0</b>  | Ascorbic Acid, ppm         | 0.0   |
|                                     |             |                            |       |
| <b>Carbohydrates, %</b>             | <b>70.8</b> |                            |       |
|                                     |             |                            |       |
| <b>Energy (kcal/g) <sup>2</sup></b> | <b>3.72</b> |                            |       |
| <b>From:</b>                        | <b>kcal</b> | <b>%</b>                   |       |
| Protein                             | 0.517       | 13.9                       |       |
| Fat (ether extract)                 | 0.368       | 9.9                        |       |
| Carbohydrates                       | 2.832       | 76.2                       |       |

1. Formulation based on calculated values from the latest ingredient analysis information. Since nutrient composition of natural ingredients varies and some nutrient loss will occur due to manufacturing processes, analysis will differ accordingly. Nutrients expressed as percent of ration on an As-Fed basis except where otherwise indicated.  
 2. Energy (kcal/gm) - Sum of decimal fractions of protein, fat and carbohydrate x 4,9,4 kcal/gm respectively.

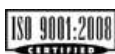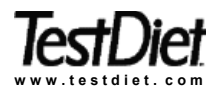

**Table S3.** Skull landmarks (cranium + midface)

| <b>Landmark</b> | <b>Description</b>                                                         |
|-----------------|----------------------------------------------------------------------------|
| 1               | Nasal bone's most anterior suture                                          |
| 2               | Nasal bone's most posterior suture                                         |
| 3               | Frontal bone's most posterior suture                                       |
| 4               | Parietal bone's most posterior suture                                      |
| 5-6             | Frontal-squamosal intersection at temporal crest                           |
| 7-8             | The intersection between parietal, occipital and squamosal bones           |
| 9-10            | Joining of squamosal body to zygomatic process                             |
| 11-12           | Most anterior suture of jugal bone and the maxillary zygomatic process     |
| 13-14           | Mid zygomatic bone                                                         |
| 15-16           | Intersection of frontal process of maxilla with frontal and lacrimal bones |
| 17-18           | Midpoint of the anterior zygomatic process (dorsal view)                   |
| 19-20           | Most inferior point of the zygomatic process                               |
| 21-22           | Anterior-most point at intersection of premaxillae and nasal bones         |
| 23-24           | Most superior point of the incisor alveolus                                |
| 25-26           | Most inferior anterior point of the incisor alveolus                       |
| 27-28           | Most inferior lateral point on premaxilla-maxilla suture                   |
| 29-30           | Most anterior point of the first molar alveolus                            |
| 31-32           | Most posterior point of the third molar alveolus                           |
| 33-34           | Most anterior point of the anterior palatine foramen                       |
| 35-36           | Most posterior point of the anterior palatine foramen                      |
| 37-38           | Most inferior aspect of posterior tip of medial pterygoid process          |
| 39              | Line point of the suture between occipital and basisphenoid bones          |
| 40              | Line point of the suture between basisphenoid and presphenoid bones        |
| 41              | Line point of the suture between palatine bones.                           |
| 42              | Foramen magnum most anterior point, basion                                 |
| 43              | Foramen magnum most posterior point, bregma                                |

**Table S4.** Descriptive statistics and unpaired t-test results of skull measurements

| Variable                                                 |         | Control<br>(Mean $\pm$ SD) | Experiment<br>(Mean $\pm$ SD) | p-value                 |
|----------------------------------------------------------|---------|----------------------------|-------------------------------|-------------------------|
| <b>Cranial Centroid Size</b><br>( $\mu\text{m}$ )        | Total   | 42480 $\pm$ 2197           | 41017 $\pm$ 3181              | 0.2491 <sup>ns</sup>    |
|                                                          | Males   | 40102 $\pm$ 186.9          | 44244 $\pm$ 841.4             | <0.0001 <sup>****</sup> |
|                                                          | Females | 44064 $\pm$ 1065           | 38691 $\pm$ 1224              | <0.0001 <sup>****</sup> |
| <b>Midface Centroid Size</b><br>( $\mu\text{m}$ )        | Total   | 14903 $\pm$ 919.1          | 14370 $\pm$ 1368              | 0.3221 <sup>ns</sup>    |
|                                                          | Males   | 13918 $\pm$ 133.6          | 15791 $\pm$ 419.9             | <0.0001 <sup>****</sup> |
|                                                          | Females | 15560 $\pm$ 465.9          | 13372 $\pm$ 509.3             | <0.0001 <sup>****</sup> |
| <b>Cranial Length (CL)</b><br>( $\mu\text{m}$ )          | Total   | 21792 $\pm$ 1161           | 20878 $\pm$ 1475              | 0.0892 <sup>ns</sup>    |
|                                                          | Males   | 20473 $\pm$ 253.3          | 22531 $\pm$ 263.1             | <0.0001 <sup>****</sup> |
|                                                          | Females | 22671 $\pm$ 260.3          | 19777 $\pm$ 484.2             | <0.0001 <sup>****</sup> |
| <b>Midface Length (ML)</b><br>( $\mu\text{m}$ )          | Total   | 7288 $\pm$ 546.9           | 6958 $\pm$ 684.5              | 0.2495 <sup>ns</sup>    |
|                                                          | Males   | 6742 $\pm$ 95.2            | 7727 $\pm$ 193.3              | <0.0001 <sup>****</sup> |
|                                                          | Females | 7651 $\pm$ 369             | 6445 $\pm$ 180.2              | <0.0001 <sup>****</sup> |
| <b>Cranial Breadth (CB)</b><br>( $\mu\text{m}$ )         | Total   | 10895 $\pm$ 474.5          | 10390 $\pm$ 777.1             | 0.1000 <sup>ns</sup>    |
|                                                          | Males   | 10409 $\pm$ 152.1          | 11254 $\pm$ 234               | 0.0009 <sup>***</sup>   |
|                                                          | Females | 11218 $\pm$ 278.1          | 9814 $\pm$ 242.4              | <0.0001 <sup>****</sup> |
| <b>Midface Breadth (MB)</b><br>( $\mu\text{m}$ )         | Total   | 4453 $\pm$ 156.7           | 4165 $\pm$ 240                | 0.0185 <sup>*</sup>     |
|                                                          | Males   | 4289 $\pm$ 56.04           | 4356 $\pm$ 38.73              | 0.0985 <sup>ns</sup>    |
|                                                          | Females | 4562 $\pm$ 81.02           | 4038 $\pm$ 233                | 0.0022 <sup>**</sup>    |
| <b>Tissue Mineral Density (TMD)</b><br>(arbitrary units) | Total   | 0.01626 $\pm$ 0.0012       | 0.01427 $\pm$ 0.002           | 0.016 <sup>*</sup>      |
|                                                          | Males   | 0.01498 $\pm$ 0.00034      | 0.01651 $\pm$ 0.00054         | 0.0032 <sup>**</sup>    |
|                                                          | Females | 0.01711 $\pm$ 0.00064      | 0.01277 $\pm$ 0.0008          | <0.0001 <sup>****</sup> |

\*  $p < 0.05$ ; \*\*  $p < 0.005$ ; \*\*\*  $p < 0.0005$ ; \*\*\*\*  $p < 0.0001$ ; ns (no significance),  $p > 0.05$

**Table S5.** Descriptive statistics and unpaired t-test results of dental measurements

| <b>Variable</b>                                                  |         | <b>Control</b><br>(Mean $\pm$ SD) | <b>Experiment</b><br>(Mean $\pm$ SD) | <b>p-value</b>        |
|------------------------------------------------------------------|---------|-----------------------------------|--------------------------------------|-----------------------|
| <b>Molar Row Length (MRL) (<math>\mu\text{m}</math>)</b>         | Total   | 3789 $\pm$ 122.7                  | 3690 $\pm$ 188.6                     | 0.1810 <sup>ns</sup>  |
|                                                                  | Males   | 3684 $\pm$ 59.99                  | 3899 $\pm$ 59.39                     | <0.0022**             |
|                                                                  | Females | 3860 $\pm$ 100.8                  | 3550 $\pm$ 57.46                     | <0.0001****           |
| <b>Anterior Alveolar Height (AAH) (<math>\mu\text{m}</math>)</b> | Total   | 1172 $\pm$ 97.21                  | 1090 $\pm$ 117.8                     | 0.1230 <sup>ns</sup>  |
|                                                                  | Males   | 1118 $\pm$ 6.242                  | 1214 $\pm$ 73.9                      | <0.0405*              |
|                                                                  | Females | 1207 $\pm$ 114.6                  | 1007 $\pm$ 31.99                     | <0.0020**             |
| <b>Middle Alveolar Height (MAH) (<math>\mu\text{m}</math>)</b>   | Total   | 697.6 $\pm$ 76.22                 | 675.1 $\pm$ 76.06                    | 0.5158 <sup>ns</sup>  |
|                                                                  | Males   | 677.4 $\pm$ 38.31                 | 750.7 $\pm$ 25.39                    | <0.0188*              |
|                                                                  | Females | 711.1 $\pm$ 95.03                 | 624.6 $\pm$ 48.90                    | <0.0755 <sup>ns</sup> |

\*  $p < 0.05$ ; \*\*  $p < 0.005$ ; \*\*\*  $p < 0.0005$ ; \*\*\*\*  $p < 0.0001$ ; ns (no significance)

**Figure S1.** Weights (in grams) of 6-week-old mice at collection.

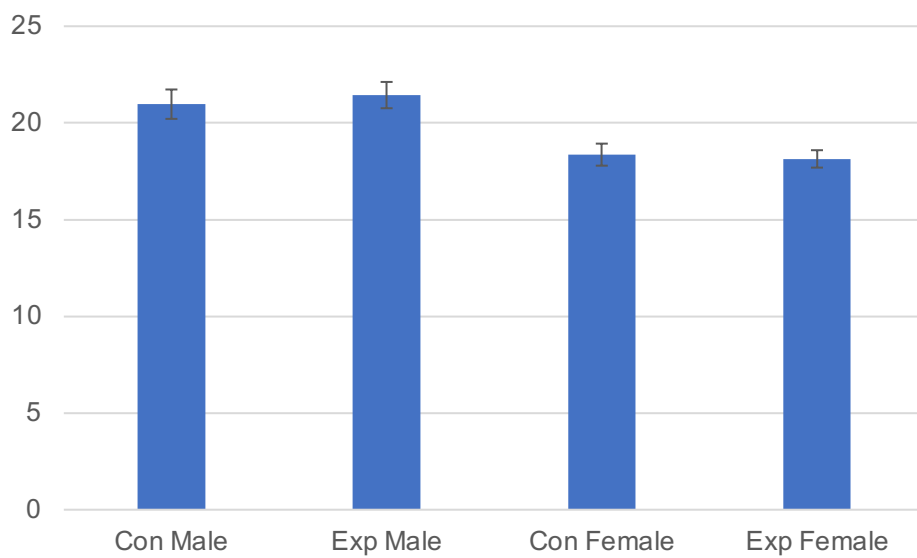

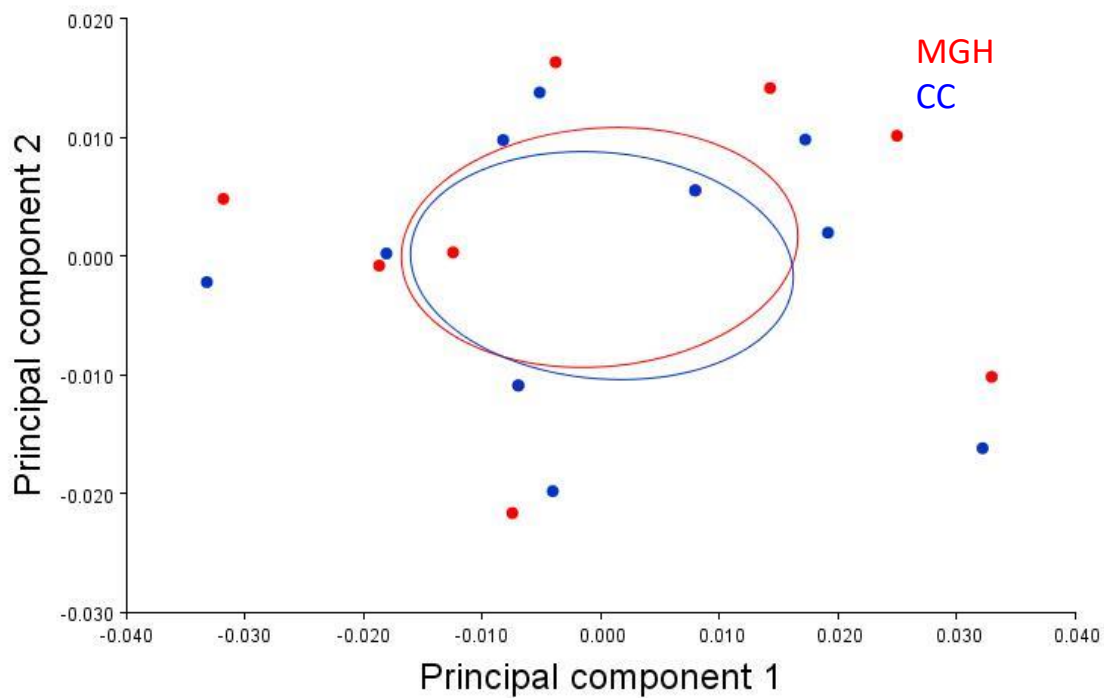

**Fig. S2.** Example of an inter-reliability test between observers MGH and CC demonstrating the consistency of landmarking (43 total landmarks) of the skull (16).
